# Supplementary material for: The Small GTPase FgRab1 Plays Indispensable Roles in the Vegetative Growth, Vesicle Fusion, Autophagy and Pathogenicity of Fusarium graminearum
Source: MDPI journal article supplement (doi:10.3390/ijms23020895), 2022-01-14
Supplement: s1 [file s1]

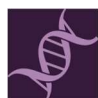

Supplementary material

# The Small GTPase FgRab1 Plays Indispensable Roles in the Vegetative Growth, Vesicle Fusion, Autophagy and Pathogenicity of *Fusarium graminearum*

Yanping Yuan <sup>1</sup>, Meiru Zhang <sup>1</sup>, Jingjing Li <sup>1</sup>, Chengdong Yang <sup>1</sup>, Yakubu Saddeeq Abubakar <sup>1,2</sup>, Xin Chen <sup>3</sup>, Wenhui Zheng <sup>3</sup>, Zonghua Wang <sup>1,4</sup>, Huawei Zheng <sup>4,\*</sup> and Jie Zhou <sup>1,\*</sup>

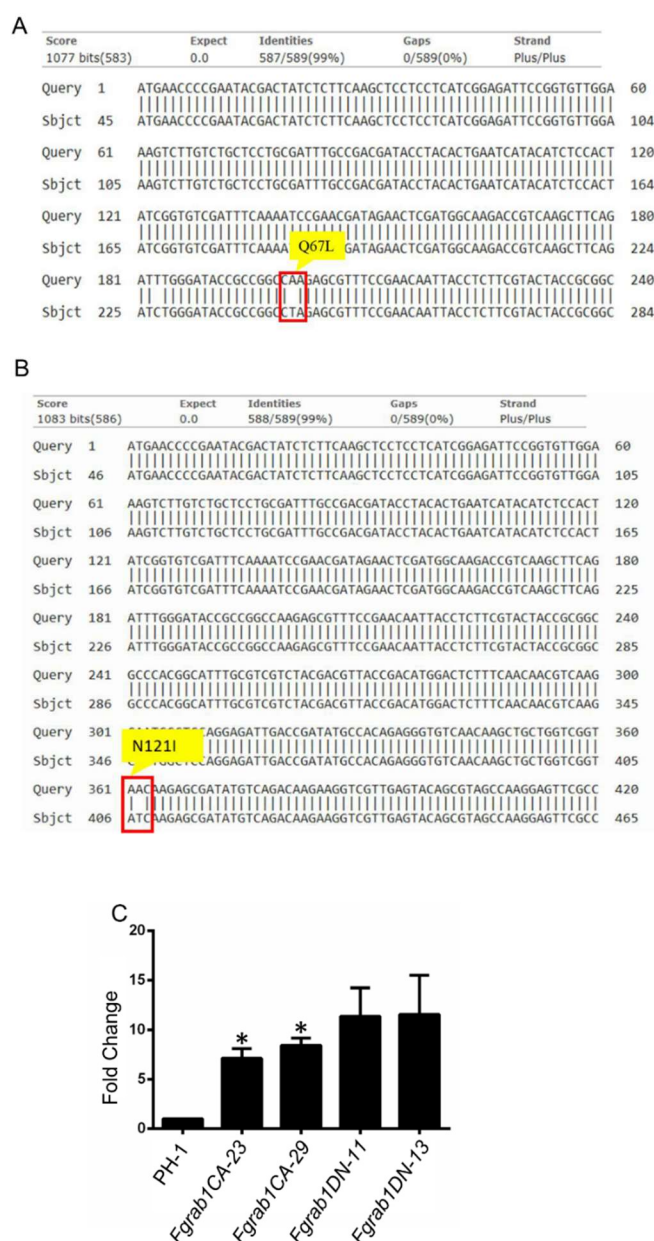

**Figure S1.** Construction and identification of *FgRab1CA* and *FgRab1DN* strains: (A, B) Sequencing results for positive transformants of *FgRab1CA* and *FgRab1DN* strains. (C) Relative expression levels of *FgRAB1* in *FgRab1CA* and *FgRab1DN* strains, \* $P < 0.05$ , \*\* $P < 0.01$  according to *t*-test.

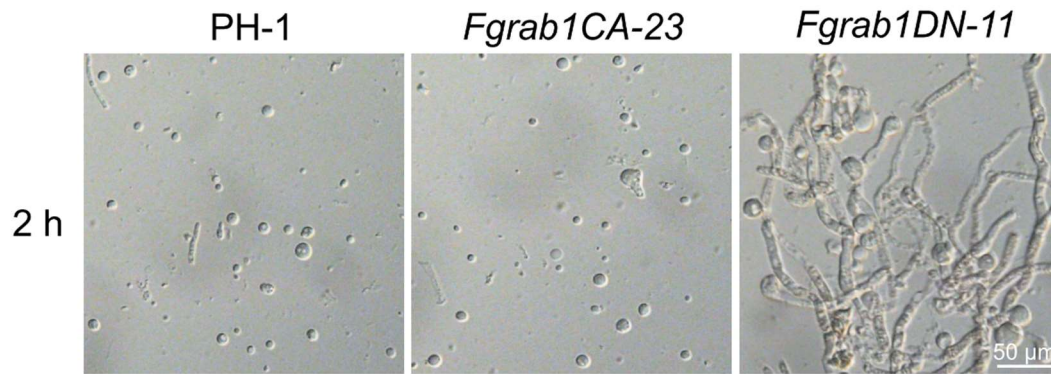

**Figure S2.** Light microscopic examination of the protoplasts released by the indicated strains after 2 h.

**Table S1.** Wild type (PH-1) and mutant strains of fungi used in this study.

| Strain                       | Description                                                | Reference  |
|------------------------------|------------------------------------------------------------|------------|
| PH-1                         | Wild type                                                  |            |
| <i>Fgrab1CA-23</i>           | Constitutively active in PH-1                              | This study |
| <i>Fgrab1DN-11</i>           | Dominant negative in PH-1                                  | This study |
| FgGFP-Rab1/ER-mCherry        | FgGFP-Rab1 and ER-mCherry are co-express in PH-1           | This study |
| FgGFP-Rab1/TGN-mCherry       | FgGFP-Rab1 and TGN-mCherry are co-express in PH-1          | This study |
| FgGFP-Rab1/Lifeactin-RFP     | FgGFP-Rab1 and Lifeactin-RFP are co-express in PH-1        | This study |
| PH-1: ER-mCherry             | PH-1 strain expressing the ER-mCherry construct            | This study |
| <i>Fgrab1CA</i> : ER-mCherry | <i>Fgrab1CA</i> strain expressing the ER-mCherry construct | This study |
| <i>Fgrab1DN</i> : ER-mCherry | <i>Fgrab1DN</i> strain expressing the ER-mCherry construct | This study |
| PH-1: GFP-FgSnc1             | PH-1 strain expressing the FgSnc1-GFP construct            | This study |
| <i>Fgrab1CA</i> : GFP-FgSnc1 | <i>Fgrab1CA</i> strain expressing the FgSnc1-GFP construct | This study |
| <i>Fgrab1DN</i> : GFP-FgSnc1 | <i>Fgrab1DN</i> strain expressing the FgSnc1GFP construct  | This study |

**Table S2.** Primers used in this study.

| Primers    | (5' → 3') Sequences                                    | Function                         |
|------------|--------------------------------------------------------|----------------------------------|
| FGRab1DN1F | CGGGATCCATGAACCCGAATACGACTA                            | For <i>Fgrab1DN</i> construction |
| FGRab1DN1R | TGTCTGACATATCGCTCTTGATACCGACC<br>AGCAGCTTG             |                                  |
| FGRab1DN2F | CAAGCTGCTGGTCGGTATCAAGAGCGAT                           |                                  |
| FGRab1DN2R | ATGTCAGACA<br>ATAAGAATGCGGCCGCTTAGCAGCAGCT<br>GTTGTTGG |                                  |
| FGRab1CA1F | AAAATGGCTCGAGGGGGATCCATGAACC<br>CCGAATACGACTA          | For <i>Fgrab1CA</i> construction |
| FGRab1CA1R | TTCGGAAACGCTCTAGGCCGGCGGTATCC<br>CAAATCTGAAG           |                                  |

|                    |                                               |                     |
|--------------------|-----------------------------------------------|---------------------|
| FGRab1CA2F         | TGGGATACCGCCGGCCTAGAGCGTTTCCG<br>ACAATTACCT   |                     |
| FGRab1CA2R         | TGAGTGGAATGATGCGGCCGCTTAGCAG<br>CAGCTGTTGTTGG |                     |
| pTE11-F2           | AGCCGACTATACTGAGCACCAACGC                     | For <i>Fgrab1DN</i> |
| pTE11-R2           | TAAACACTGTAACCCGCAACGAAG                      | construction        |
| Fgrab1 QF          | AACCCCGAATACGACTA                             | qRT-PCR primer      |
| Fgrab1 QR          | TTCAGTGTAGGTATCGTC                            | for <i>FgRAB1</i>   |
| <i>β-Tubulin F</i> | TCTGACTTCAGGAATGGTCGTTAC                      | Inference primers   |
| <i>β-Tubulin R</i> | AGCGGTCTGGATGTTGTTGG                          | for qRT-PCR         |

---
